# Supplementary material
Source: PubMed Central journal article supplement (PMC4475928)
Supplement: MCB.00029-15_zmb999100893so1.pdf [file MCB.00029-15_zmb999100893so1.pdf]

Figure S1

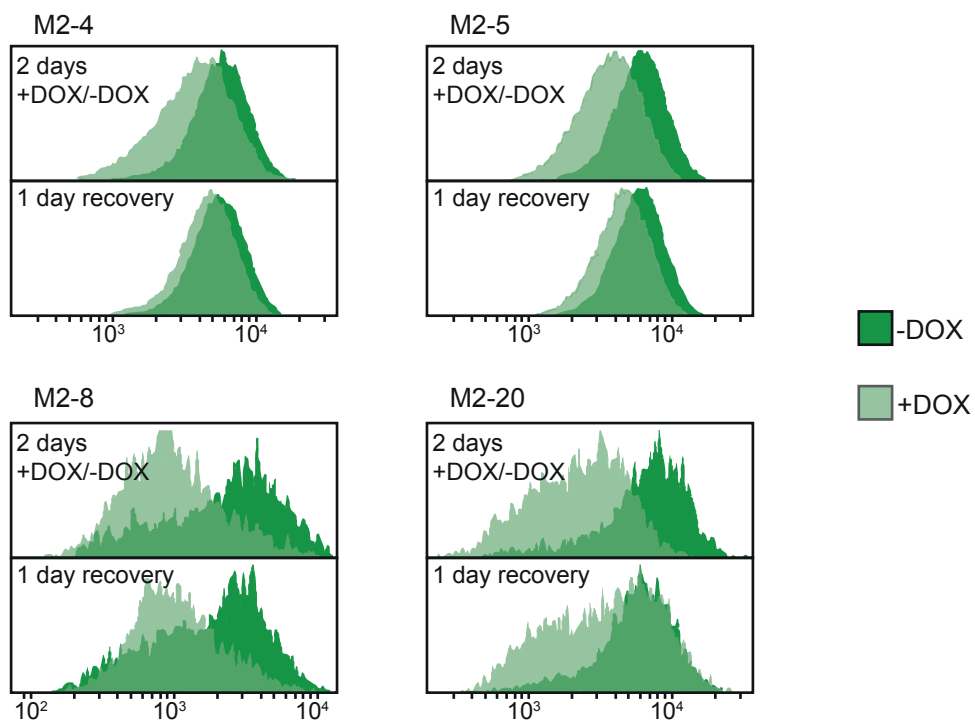

**FIG S1** Representative histograms of EGFP fluorescence intensity (FI) distribution in clones M2-4, M2-5, M2-8 and M2-20 as determined by FACS analysis. Dark green represents uninduced cells, and light green the cells treated with doxycycline. Upper panels shows repression after two days of doxycycline treatment as compared to untreated control, and lower panels shows the respective situation one day later, after doxycycline has been washed out.

Figure S2

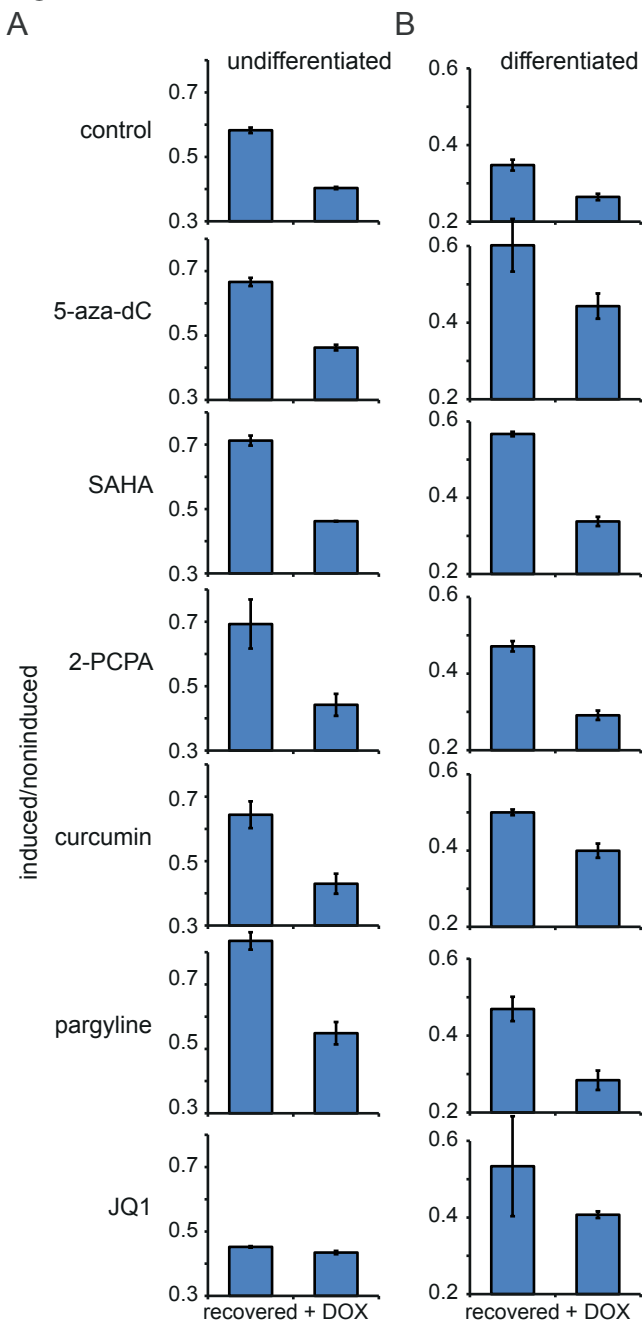

**FIG S2** Interference of small molecule inhibitors with chromatin modifiers. (A) Mean EGFP FI of induced/noninduced M2-3 cells after two days of doxycycline treatment (+DOX) and after two days of doxycycline treatment followed by one day of recovery (recovered). Small molecule inhibitors used are indicated. Error bars represent SD of three independent experiments. (B) Same as (A) but in differentiating M2-3 cells. Time schedule as in Figure 5A but all experimental steps taken one day earlier and cells analyzed at day 2 of differentiation. Error bars represent SD of three independent experiments.

Table S1

| name                          | abbreviation | targets             | inhibition                      |
|-------------------------------|--------------|---------------------|---------------------------------|
| 5-aza-2'-deoxycytidine        | 5-aza-dC     | DNMTs               | DNA methylation                 |
| suberanilohydroxamic acid     | SAHA         | HDACs 1-9           | histone deacetylation           |
| 2,4-pyridinedicarboxylic acid | 2,4-PDCA     | JARID1/JMJD2 family | H3K4me3/H3K36me3 demethylation  |
| tranylcypromine               | 2-PCPA       | LSD1                | H3K4me1/2 demethylation         |
| curcumin                      | CUR          | HATs                | histone acetylation             |
| pargyline                     | PAR          | LSD1                | H3K9me1/2 demethylation         |
| thieno-triazolo-1,4-diazepine | JQ1          | BET family/BRD4     | BRD4/transcriptional elongation |

**TABLE S1** Small molecule inhibitors and their effects on histone modifying enzymes. First column gives name, second abbreviation, third enzymes targeted and fourth biological process inhibited.

| #   | SEQUENCE                    | DESCRIPTION                                                    |
|-----|-----------------------------|----------------------------------------------------------------|
| 228 | ACACGCAGCTCATTGTAG          | First strand primer for strand-specific <i>Actb</i> expression |
| 226 | GATATCGCTGCGCTGGTCGT        | FOR primer <i>Actb</i> expression                              |
| 227 | AGATCTTCTCCATGTCGTCC        | REV primer <i>Actb</i> expression                              |
| 217 | CTTCTCGTTGGGGTCTTTGC        | First strand primer for strand-specific EGFP expression        |
| 106 | AGGGCATCGACTTCAAGGAG        | FOR primer EGFP expression                                     |
| 107 | CACCTTGATGCCGTTCTTCTG       | REV primer EGFP expression                                     |
| 104 | CAAGATCCGCCACAACATCG        | First strand primer for strand-specific ptet proximal expr.    |
| 222 | TTTCACTGCATTCTAGTTGTGGT     | FOR primer ptet proximal expression                            |
| 223 | GGTACCCGGGGATCCTCTA         | REV primer ptet proximal expression                            |
| 220 | TGGTAATCGTGCGAGAGGG         | First strand primer for strand-specific ptet distal expr.      |
| 231 | TCCCCTTCTCCCTCTCCAG         | FOR primer ptet distal expression                              |
| 232 | CTGCAGAATTCTAGAGCCGC        | REV primer ptet distal expression                              |
| 195 | CTCTGACTGACCGGTTACT         | FOR primer ChIP for CAG promoter                               |
| 196 | TTTACGCAGCCACAGAAAA         | REV primer ChIP for CAG promoter                               |
| 323 | CACATTTGTAGAGGTTTTACTTGCT   | FOR primer ChIP for GFP-ptet                                   |
| 324 | AGCTGCAATAAACAAAGTTAAACAACA | REV primer ChIP for GFP-ptet                                   |
| 317 | GAGCTCGAATTCTCCAGGCG        | FOR primer ChIP for ptet promoter                              |
| 318 | GTATGTCGAGGTAGGCGTG         | REV primer ChIP for ptet promoter                              |
| 343 | TCTCCAGCATCCTCTACACA        | FOR primer ChIP for H3K36me3 control in <i>Mcm2</i>            |
| 344 | CTATGGTATGTGTGGTGGGCA       | REV primer ChIP for H3K36me3 control in <i>Mcm2</i>            |
| 331 | GCTAGGTTAGGAGAGCCCAGA       | FOR primer ChIP for H3K4me3 control in <i>Mrps14</i>           |
| 332 | AGGTCTCAATCATCCGACTCTC      | REV primer ChIP for H3K4me3 control in <i>Mrps14</i>           |
| 204 | GGATTTTTTTTTGTTTTAAATTTGTG  | FOR primer for bisulfite sequencing amplicon                   |
| 207 | AAATAAACTTCAAATCAACTTACC    | REV primer for bisulfite sequencing amplicon                   |
| 209 | GTAAAACGACGGCCAG            | FOR primer for amplification from bacteria (M13 -20 FOR)       |
| 208 | CAGGAAACAGCTATGAC           | REV primer for amplification from bacteria (M13 REV)           |
| 302 | ATTTAGGTGACACTATAG          | Sequencing primer for bisulfite sequencing (Sp6)               |

**TABLE S2** Primers used in this study.
